# Supplementary material for: G-CSF resistance of ELANE-mutant neutropenia depends on SERF1-containing truncated–neutrophil elastase aggregates
Source: JCI journal article supplement (doi:10.1172/jci177342), 2024-11-19

Figure 2A

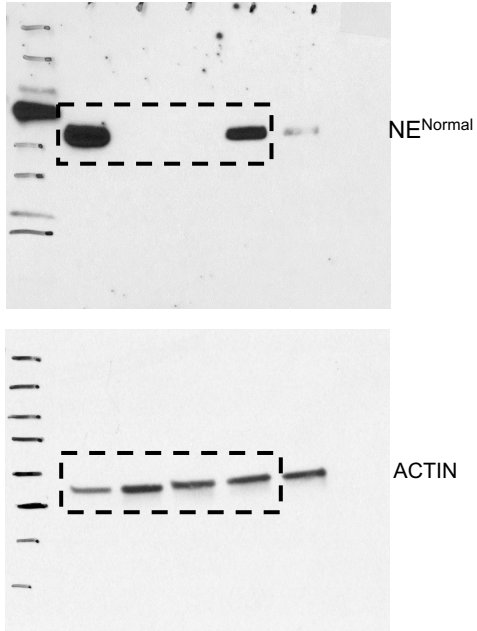

Figure 2B

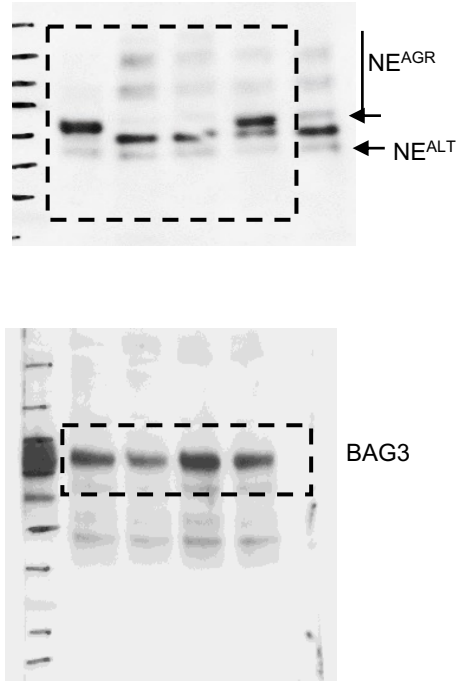

Figure 2I

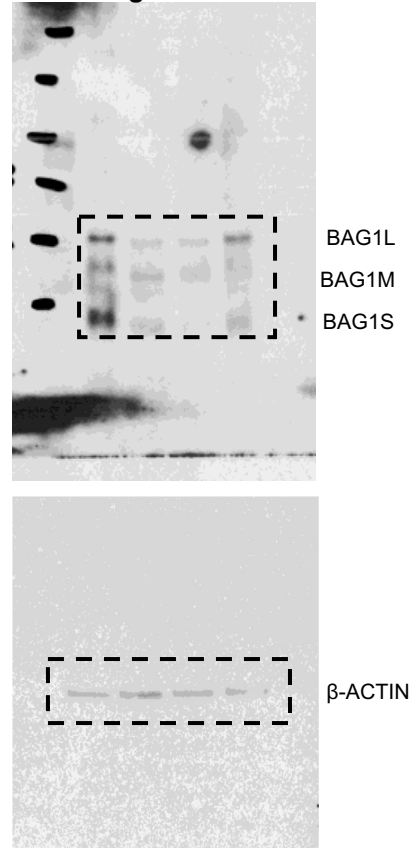

Figure 2C

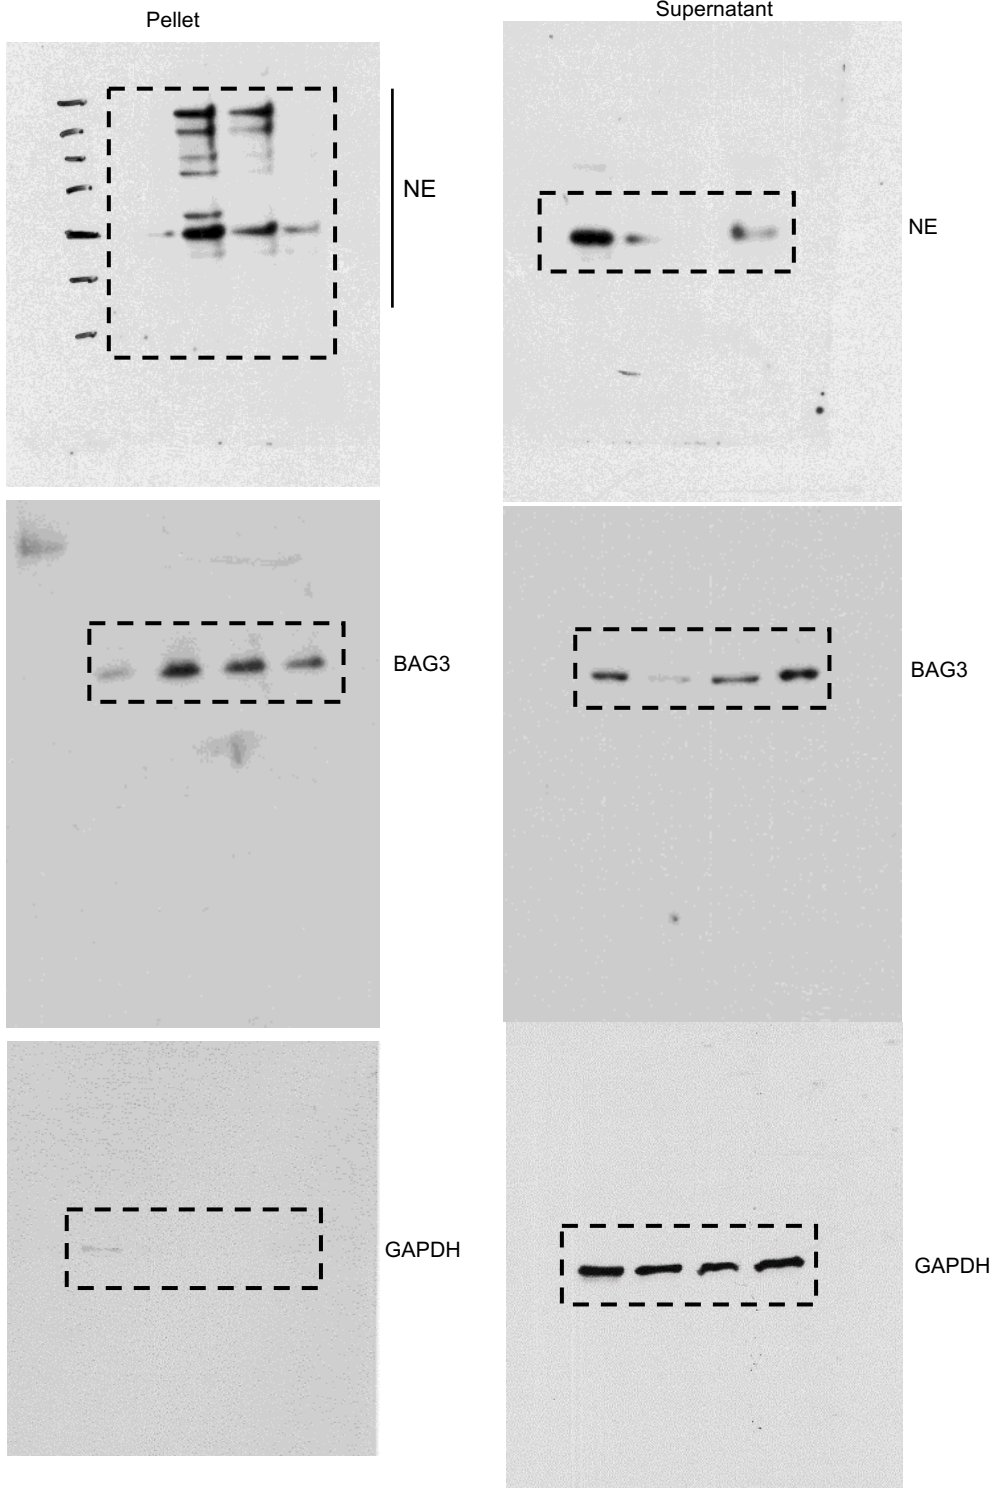

**Figure 3A**

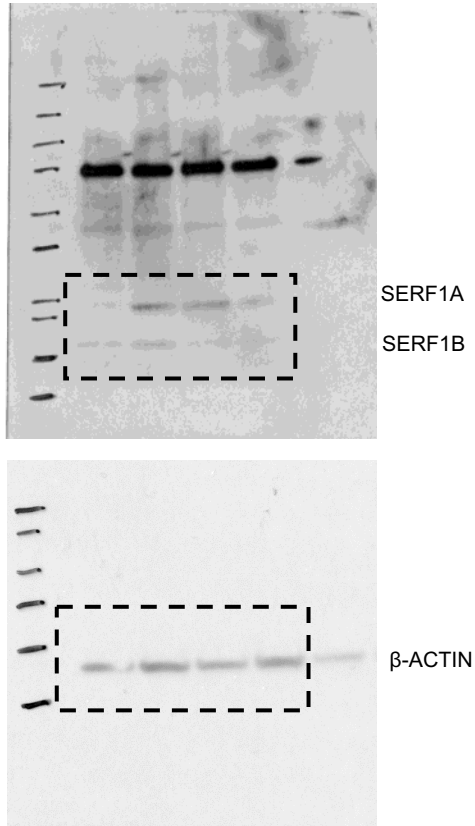

Supplementary Figure 8C

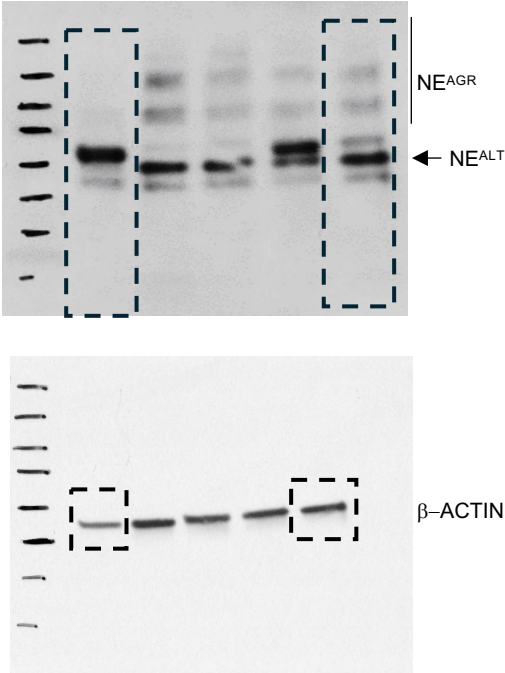

Supplementary Figure 8D

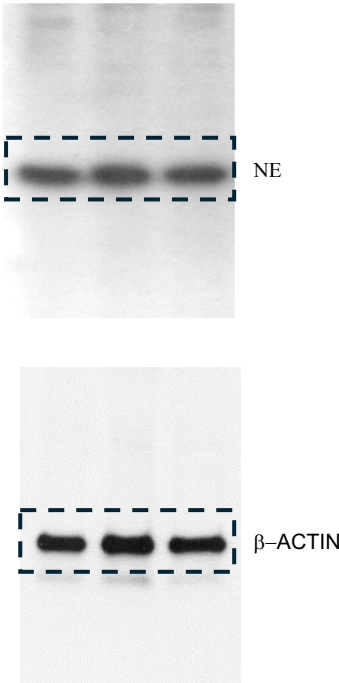

Supplementary Figure 10A

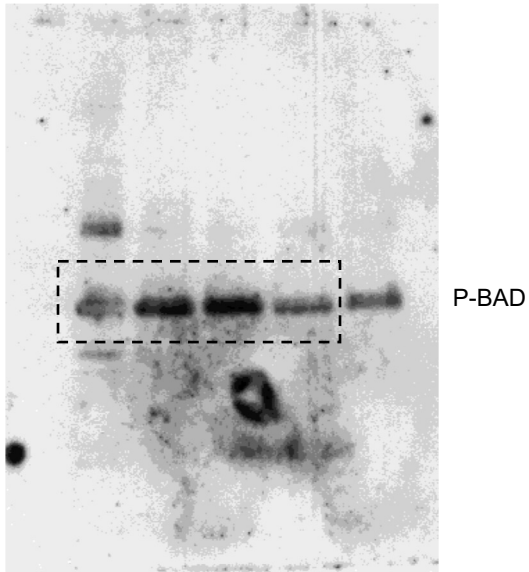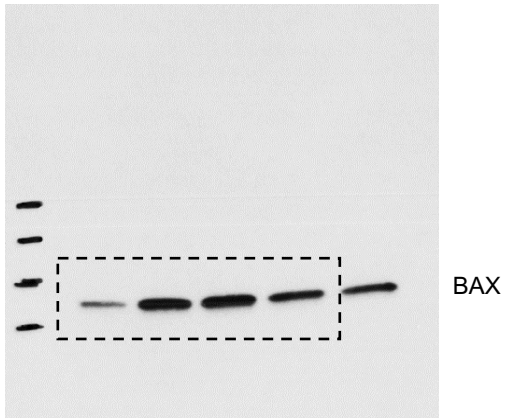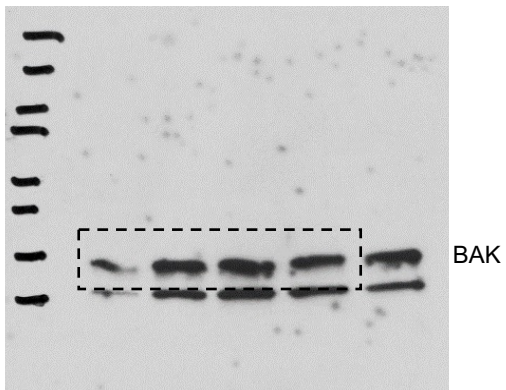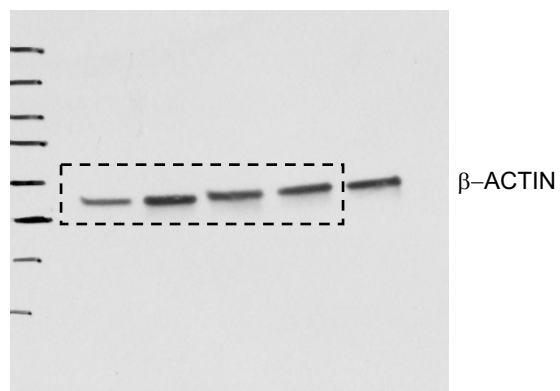

Supplementary Figure 11A

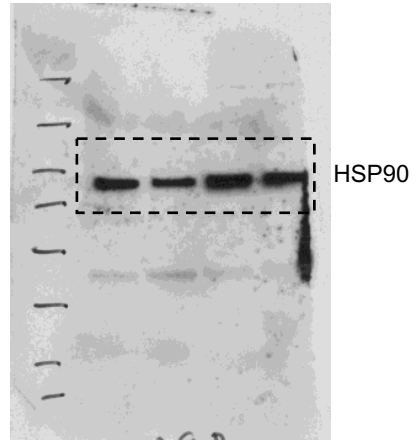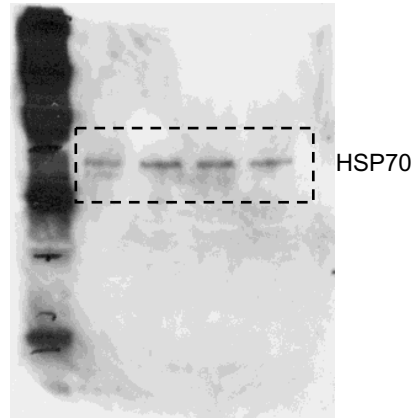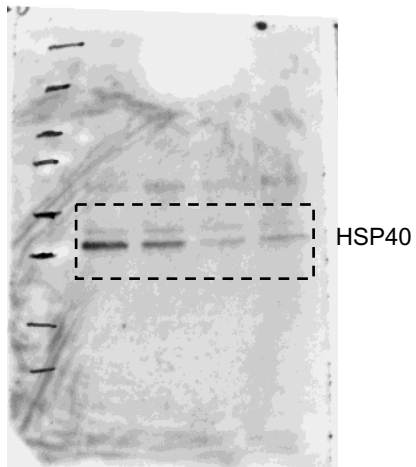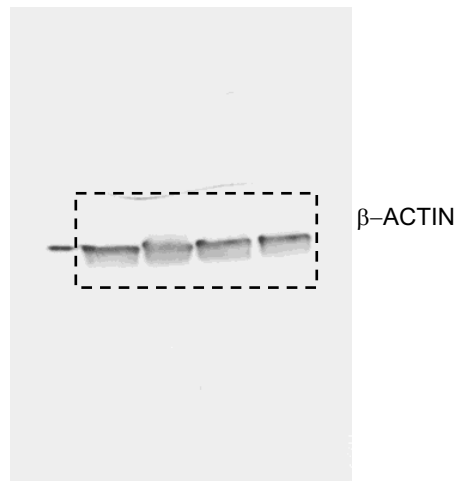

Supplement: sd2 [file 2]
